# Early signals of vaccine driven perturbation seen in pneumococcal carriage population genomic data

Chrispin CHAGUZA<sup>1,2,3,\*</sup>, Ellen HEINSBROEK<sup>2,4</sup>, Rebecca A. GLADSTONE<sup>1</sup>, Terence TAFATATHA<sup>5</sup>, Maaïke ALAERTS<sup>3,6</sup>, Chikondi PENO<sup>3,7</sup>, Jennifer E. Cornick<sup>2,3</sup>, Patrick MUSICHA<sup>2,3,8,9</sup>, Naor BAR-ZEEV<sup>2,3,10</sup>, Arox KAMNG'ONA<sup>2,3,11</sup>, Aras KADIOGLU<sup>2</sup>, Lesley MCGEE<sup>12</sup>, William P. HANAGE<sup>13</sup>, Robert F. BREIMAN<sup>14</sup>, Robert S. HEYDERMAN<sup>3,15</sup>, Neil FRENCH<sup>2,3,¶</sup>, Dean B. EVERETT<sup>3,7,¶</sup>, and Stephen D. BENTLEY<sup>1,16,¶,\*</sup>

<sup>1</sup>Parasites and Microbes, Wellcome Sanger Institute, Wellcome Genome Campus, Cambridge, UK

<sup>2</sup>Department of Clinical Infection, Microbiology and Immunology, Institute of Infection and Global Health, University of Liverpool, Liverpool, UK

<sup>3</sup>Malawi-Liverpool-Wellcome Trust Clinical Research Programme, Blantyre, Malawi

<sup>4</sup>HIV & STI Department, National Infection Service, Public Health England, London, UK

<sup>5</sup>Malawi Epidemiology Intervention Research Unit (formerly KPS), Chilumba, Malawi

<sup>6</sup>Center of Medical Genetics, University of Antwerp, Antwerp, Belgium

<sup>7</sup>MRC Centre for Inflammation Research, Queens Medical Research Institute, University of Edinburgh, Edinburgh, UK

<sup>8</sup>Mahidol Oxford Tropical Medicine Research Unit, Mahidol University, Bangkok, Thailand

<sup>9</sup>Nuffield Department of Medicine, University of Oxford, Oxford, UK

<sup>10</sup>Department of International Health, Johns Hopkins Bloomberg School of Public Health, Baltimore, USA

<sup>11</sup>Department of Biomedical Sciences, University of Malawi, College of Medicine, Blantyre, Malawi

<sup>12</sup>Respiratory Diseases Branch, Centers for Disease Control and Prevention, Atlanta, USA

<sup>13</sup>Center for Communicable Disease Dynamics, Department of Epidemiology, Harvard T.H. Chan School of Public Health, Boston, Massachusetts, USA

<sup>14</sup>Hubert Department of Global Health, Rollins School of Public Health, Emory University, Atlanta, USA

<sup>15</sup>Division of Infection and Immunity, University College London, London, UK

<sup>16</sup>Department of Pathology, University of Cambridge, Cambridge, UK

\*Corresponding author: C.C. (cc19@sanger.ac.uk) and S.D.B. (sdb@sanger.ac.uk).

¶N.F., D.B.E. and S.D.B. contributed equally to this work.

## 36 **Abstract**

37 Pneumococcal conjugate vaccines (PCV) have reduced pneumococcal diseases glob-  
38 ally. Despite this, much remains to be learned about their effect on pathogen pop-  
39 ulation structure. Here we undertook whole genome sequencing of 660 pneumococ-  
40 cal strains from asymptomatic carriers to investigate population restructuring in  
41 pneumococcal strains sampled before and after PCV13 introduction in a previously  
42 vaccine-naïve setting. We show substantial decreasing frequency of vaccine-type (VT)  
43 strains and their strain diversity post-vaccination in the vaccinated but not unvacci-  
44 nated age groups indicative of direct but limited or delayed indirect effect of vaccina-  
45 tion. Clearance of identical VT serotypes associated with multiple lineages occurred  
46 regardless of their genetic background. Interestingly, despite the increasing frequency  
47 of non-vaccine type (NVT) strains through serotype replacement, the serotype diver-  
48 sity was not fully restored to the levels observed prior to vaccination implying lim-  
49 ited serotype replacement. The frequency of antibiotic resistant strains was low and  
50 remained largely unchanged post-vaccination but intermediate-penicillin-resistant  
51 lineages were reduced in the post vaccine population. Significant perturbations marked  
52 by changing frequency of accessory genes associated with diverse functions especially  
53 mobile genetic elements and bacteriocin activity were detected. This phylogenomic  
54 analysis demonstrates early vaccine-induced pneumococcal population restructuring  
55 not only at serotype but also accessory genome level.

## 56 **Author summary**

57 Different formulations of PCVs have been effective in reducing the invasive pneu-  
58 mococcal disease burden globally. Clinical trials have started to indicate high im-  
59 pact and effectiveness of PCV13 in Sub Saharan Africa (SSA) but there is limited  
60 understanding of how the introduction of PCVs alters the population structure of  
61 pneumococcal strains at serotype and genomic level. Here we investigated this using  
62 pneumococcal strains sampled pre- and post-PCV13 introduction from a previously  
63 vaccine naïve setting in Northern Malawi. Our findings reveal decrease in frequency  
64 of VT serotypes and their associated lineages in the largely vaccinated under-five  
65 population but not older individuals indicating a direct but limited or delayed in-  
66 direct protection. The diversity of serotypes also decreased post-vaccination in VT  
67 strains in the under-fives but there was no change in NVT strains suggesting incom-  
68 plete serotype replacement. At the genomic level, logistic regression revealed chang-  
69 ing frequency of accessory genes largely associated with mobile genetic elements but

70 such changes did not include any antibiotic resistance genes. These findings show  
71 significant perturbations at serotype and accessory genome level in carried pneumo-  
72 coccal population after two years from PCV13 introduction but the pneumococcal  
73 population was still perturbed and had not returned to a new equilibrium state.

## 74 **Introduction**

75 Pneumococcal polysaccharide antigens covalently attached to carrier proteins elicit  
76 sufficient serotype-specific antibody responses against *Streptococcus pneumoniae* (the  
77 pneumococcus) and form the basis of pneumococcal conjugate vaccines (PCV). Dif-  
78 ferent formulations of PCVs have been licensed and introduced globally, and clinical  
79 case-control, cohort and surveillance studies have documented high effectiveness of  
80 these vaccines on non-invasive [1] and invasive pneumococcal disease (IPD) [2]. For  
81 example, after introduction of PCV7, 69% and 57% reductions in IPD were observed  
82 in USA and UK respectively whereby vaccine type (VT) strains decreased by >90%  
83 [2, 3]. Few African countries introduced PCV7 because its projected low coverage  
84 of VTs as highly common invasive serotypes in this setting (e.g. serotypes 1 and 5)  
85 were not covered [4]. Regardless, PCV7 caused >85% reduction in IPD in South  
86 Africa, crucially in HIV-infected individuals [5]. Consistent with findings in high-  
87 income countries [6], higher-valent PCVs appears to be highly effective in reducing  
88 VT serotypes in carriage (>65%) and IPD (>80%) in Africa[7–9].

89  
90 In addition to reducing IPD [2, 8, 9], PCV has an added benefit of reducing VT car-  
91 riage [10]. However, the impact on overall carriage rate and density is not substan-  
92 tial [11, 12]. This is because PCV introduction induces serotype replacement whereby  
93 reduction of VTs substantial alters serotype competition dynamics thereby prompt-  
94 ing an increase of non-vaccine type (NVT) strains uncommon prior to vaccination  
95 [13]. A well-known example of replacement is the upsurge of serotype 19A post-PCV7  
96 introduction [14]. While invasive potential of replacement NVT serotypes is typi-  
97 cally lower than for VTs, this is not universally true, and some strains retain propen-  
98 sity for invasive disease [15]. Therefore, understanding post-vaccination dynamics in  
99 pneumococcal population is crucial to inform future clinical interventions and it may  
100 be more informative to study the carriage population where evolution is ongoing,  
101 rather than studying isolates from disease which is considered to be an evolutionary  
102 dead-end.

103

104 In this study, we undertook whole genome sequencing (WGS) of 660 pneumococ-  
105 cal strains sampled before and after nation-wide introduction of PCV13 vaccine in  
106 a previously vaccine-naïve setting of Northern Malawi to investigate early changes  
107 in population structure, serotype composition and diversity, accessory genome vari-  
108 ation. PCV13 was introduced in November 2011 in Malawi via an accelerated  
109 ‘3+0’ schedule (6, 10 and 14 weeks) with a limited catch-up for infants in the first  
110 year from introduction [16]. WGS of the isolates was undertaken by the Global Pneu-  
111 mococcal Sequencing (GPS) project ([www.pneumogen.net](http://www.pneumogen.net)), which to date has se-  
112 quenced  $\approx 23,000$  pneumococcal strains sampled globally to map out post-vaccination  
113 evolution patterns of strains to inform future vaccine design. Here we focus on car-  
114 riage samples from northern Malawi and present evidence of early vaccine-induced  
115 population restructuring at serotype, lineage and accessory genome level.

## 116 Results

### 117 Defining the population structure

118 Genomes were sequenced for 660 isolates collected from healthy carriers before and  
119 after introduction of PCV13 in a previously vaccine-naïve population in the Karonga  
120 district of northern Malawi (Fig 1a, S1 Data). A total of 45 serotypes and 169 se-  
121 quence types (STs) were detected with evidence of serotype-switching within lin-  
122 eage due to recombination [17]. From a reference-free 1,050,021bp multiple sequence  
123 alignment of the 660 study genomes we identified 88,961 single nucleotide polymor-  
124 phisms (SNP) which were used to infer their genetic population structure using an  
125 unsupervised hierarchical clustering algorithm [18] (S1-5 Fig). This approach identi-  
126 fied twenty-three genomic clusters (GC) or lineages with one GC (GC23) appearing  
127 to be polyphyletic (Fig 1b). The GCs exhibited different within-lineage sequence di-  
128 versity due to variations in recombination and age of the lineage (S6 Fig). We then  
129 used this defined population to investigate changes in frequency of serotypes, lin-  
130 eages and accessory genes post-PCV13 introduction while controlling for serotype  
131 category and sampling period.

### 132 Decrease of VT serotypes and their GCs signify PCV impact

133 Changes in frequency of GCs and their constituent serotypes before and after vac-  
134 cination signaled substantial restructuring of the pneumococcal carriage population  
135 two years after PCV introduction. Using the Fisher’s Exact test, three GCs namely

136 GC3 ( $P=0.002$ ), GC16 ( $P=0.004$ ) and GC17 ( $P=0.004$ ) showed a post-vaccination  
137 increase in frequency but there was a decrease of GC10 ( $P=0.016$ ) and GC19 ( $P=0.026$ )  
138 (Fig 2a,b, S1 Table). The reduced frequency of GCs, which were highly associated  
139 with VTs, largely reflected reduction of VTs in vaccinated children under five years  
140 old; a reduction that was not seen in the over five year old unvaccinated popula-  
141 tion (Fig 2c,d, S2 Table). We modelled the relationship between frequency of VT  
142 and NVT serotypes pre- and post-vaccination using linear regression and there was  
143 a smaller regression coefficient for VTs than NVT serotypes (Fig 2c,d). This showed  
144 that PCV13 reduced frequency of VT at a higher rate than NVT serotypes in the  
145 GCs. The majority of the GCs showed no change in odds ratio of VT serotypes in  
146 under-fives relative to over-fives while only four GCs (GC4,16,19,22) showed signif-  
147 icant changes post-vaccination (S7 Fig, S3 Table). The decrease in the overall fre-  
148 quency of VT serotypes was evident ( $P=4.80 \times 10^{-8}$ , Fisher's Exact test) in strains  
149 sampled from under-fives but not over-fives ( $P=0.3739$ , Fisher's Exact test) (Fig  
150 2e-g). The frequency of VT strains was also higher in strains from under-fives than  
151 over-fives ( $P=8.44 \times 10^{-4}$ , Fisher's Exact test) but following vaccination their frequency  
152 became equal (33%) in both age groups ( $P=1$ , Fisher's Exact test) (Fig 2g, S4,5 Ta-  
153 ble). Similar tests revealed significant increase of four NVTs serotype 7C ( $P=0.001$ ),  
154 15B/C ( $P=0.004$ ), 23A ( $P=0.017$ ) and 28F ( $P=0.0001$ ) after vaccination in under-  
155 fives while only 28F ( $P=0.029$ ) increased in over-fives. By using a unique collection  
156 of isolates from both children and adults pre- and post-vaccination, these findings  
157 demonstrate substantial direct effects of PCV in children but either limited or in-  
158 complete indirect protection against carriage of VT strains in older individuals.

## 159 **Emergence and clonal expansion of NVT strains**

160 The overall frequency of serotypes and their dynamics within GCs revealed clonal  
161 expansion and potential emergence through capsule switching (Fig 4). With the ex-  
162 ception of serotype 28F, all serotypes were detected prior to vaccination suggesting  
163 that emergence of previously undetected serotypes following vaccination was uncom-  
164 mon. Therefore, clonal expansion of extant serotypes uncommon prior to vaccina-  
165 tion rather than capsule-switching drove the increased frequency of NVT serotypes  
166 post-vaccination. The majority of the capsule-switches occurred pre-vaccination but  
167 the specific times when those events occurred could not be established due to short  
168 sampling frame, which could bias temporal phylogenetic signal [2 years] (Fig 3, S8  
169 Fig, S3 Table). Six capsule-switch events were detected based on phylogenetic clus-  
170 tering and ST profiles namely serotype 11A to 20 in GC7, 13 to 19A in GC9, 16F

171 to 19F in GC13, 9V to 28F in GC21, and 7C to NT in GC23 (S8 Fig). The capsule-  
172 switched strains circulated at low frequency (<1%) both pre- and post-vaccination  
173 ruling them out as a driver for the NVT serotype replacement. Of these capsule-  
174 switched serotypes, only serotype 28F, which was not detected prior to vaccination  
175 in carriage and previously studied invasive datasets [19], underwent a significant clonal  
176 expansion post-vaccination (Fig 2e,f and Fig 3). Of the two serotype 28F lineages,  
177 the increase of serotype 28F strains was due to clonal expansion of strains in NVT  
178 GC2 rather than the serotype 9V to 28F vaccine-escape capsule-switched variants in  
179 GC21 (Fig 2e,f). No serotype 28F strains were detected pre-vaccination including in  
180 previous IPD datasets, which suggested either circulation at undetectable levels pre-  
181 vaccination or importation from other countries.

182

183 Additional strains with similar ST profiles were searched in the global collection of  
184  $\approx 20,000$  strains with similar ST profiles to investigate whether there was importa-  
185 tion of serotype 28F strains from other countries. Only two strains were identified  
186 from South Africa, a serotype 28F and 9V clustering with strains in GC2 and GC21  
187 respectively both identified only post-13 introduction in South Africa (2013 and 2014).  
188 The closest matching strains from our setting were distinguished from the South  
189 African strains by 1,966 and 2,284 SNPs in GC2 and GC21, which implied no recent  
190 importation post-vaccination (Fig 4a,b). Furthermore, the maximum sequence di-  
191 vergence between serotype 28F strains in GC2 was 6,757 SNPs, which is a further  
192 contradiction of the hypothesis that serotype 28F was imported post-vaccination be-  
193 cause recently imported clones typically exhibit less diversity caused by transmis-  
194 sion bottleneck. With such a short time frame from PCV introduction (2 years), this  
195 would have been insufficient for the imported strains to accrue such high genetic di-  
196 versity considering that the pneumococcal mutation rate is  $\approx 4$  SNPs per year [20].  
197 Furthermore, although the capsule-switched 28F strains in GC21 clustered together  
198 with the serotype 9V strains, these serotypes had different STs, which suggests that  
199 the capsule-switch event occurred earlier prior to vaccination. Therefore, these find-  
200 ings demonstrate that newly emerging serotypes post-vaccination were not due to  
201 importation of novel serotypes from other countries but rather expansion of extant  
202 serotypes circulating at undetectable levels prior to vaccination.

### 203 **Reduction of Simpson diversity index indicates PCV impact**

204 Reduction in Simpson diversity among VT serotypes post-vaccination occurred in  
205 under-fives ( $P=0.022$ , resampling) further supporting direct PCV effect (Fig 5a, S6

206 Table). Reduction in Simpson diversity was also detected in NVT strains from under-  
207 fives but to a lesser extent while the opposite trend occurred in NVT strains from  
208 over-fives (S10a,b Fig, S7 Table), implying incomplete serotype replacement by NVT  
209 serotypes post-vaccination. Pre-vaccination diversity was similar for VT and NVT  
210 strains but following vaccination Simpson diversity was higher in NVT than VT strains  
211 following vaccination ( $P=0.004$ , resampling) (Fig 5b). The Simpson diversity index  
212 was higher for STs than serotypes both before ( $P=0.011$ , resampling) and after vac-  
213 cination ( $P=0$ , resampling) (S9 Fig). No changes in Simpson diversity were detected  
214 for the composition of STs post-vaccination (S10 Fig, S6,7 Table). The high stability  
215 of Simpson diversity in NVT strains post-vaccination could imply limited serotype  
216 replacement by NVTs, which has resulted in incomplete restoration of the serotype  
217 diversity to the levels observed pre-vaccination following vaccine-induced clearance  
218 of VT strains.

## 219 Antibiotic resistance

220 An important set of pneumococcal accessory genes include those encoding proteins  
221 that confer resistance to antibiotics. Previous work [21] showed almost universal re-  
222 sistance and complete sensitivity of pneumococcal strains to co-trimoxazole and cef-  
223 triaxone respectively therefore we did not investigate these antibiotics. Resistance  
224 rates were detected genotypically by quantifying the frequency of the antibiotic re-  
225 sistance conferring genes namely chloramphenicol acetyltransferase encoding gene  
226 (*cat*<sub>pC194</sub>) for chloramphenicol, macrolide efflux pump encoding genes (*mefA* and  
227 *mefE*) and ribosomal RNA methyltransferase (*ermB*) for erythromycin, ribosomal  
228 protection protein-encoding gene (*tetM*) for tetracycline. For penicillin, the mini-  
229 mum inhibitory concentrations (MIC) were genotypically predicted using allelic vari-  
230 ation in the transpeptidase domain of the penicillin binding proteins (PBP) from  
231 which the binary resistant-susceptible phenotype was inferred using BSAC criteria  
232 [22] (Fig 6a-d). There were no significant changes in resistance rates against the four  
233 antibiotics (Fig 6e-h). Interestingly, despite no change in penicillin resistance rate  
234 post-vaccination, the MICs decreased significantly ( $P=0.0098$ , Student's t test) post-  
235 vaccination due to vaccine-induced clearance of intermediate resistant lineages par-  
236 ticularly serotype 3 in GC12 (Fig 6i, S8 Table). This exemplifies how vaccine usage  
237 can be strategically employed to clear not only highly prevalent and antibiotic re-  
238 sistant pneumococcal lineages globally but also intermediate resistant lineages with  
239 high likelihood to express full resistance before they do [23]. Further genomic anal-  
240 ysis revealed the existence of a diverse catalogue of mobile genetic elements (MGE)

241 which disseminated genes responsible for resistance against macrolides, tetracycline  
242 and chloramphenicol antibiotics (Fig 6j). The macrolide (erythromycin) resistance  
243 conferring genes were associated with Tn916, Tn6003, Tn2009 and Tn2010 elements  
244 but not Tn1545, which is common elsewhere [24] (Fig 6c,d). The *mefA/E* gene were  
245 disseminated by Tn2009 and Tn2010-like elements while *ermB* was carried by Tn6003  
246 and Tn916-like conjugative elements (Fig 6c,d). Both *cat*<sub>pC194</sub> and *tetM* genes were  
247 located on Tn5253-like conjugative elements but *tetM* was more common due to its  
248 association with additional independent elements mainly Tn5251 and Tn2009-like  
249 elements (Fig 6c,d). These findings suggests no significant post-vaccination pertur-  
250 bation of the accessory gene pool associated with antibiotic resistance.

## 251 Vaccine-induced accessory genome dynamics

252 Distribution of intermediate frequency accessory genes detected in 5% to 95% of the  
253 strains were similar between different subsets of isolates including those from over-  
254 fives and under-fives regardless of serotype category both pre- and post-vaccination  
255 (Fig 7a, S12 Fig). No significant differences in frequency of accessory genes were  
256 detected among VT strains pre- and post-vaccination while three accessory genes  
257 showed significant change among NVT strains following vaccination (Fig 7a,b). The  
258 accessory genes which changed in frequency post-vaccination were detected by fit-  
259 ting a logistic regression model for the binary presence-absence genotype for each  
260 gene and assessing the coefficients for the sampling period. Other variables namely  
261 age group and serotype category were included in the model formulation to account  
262 for their group effects. Similar analysis was done to determine accessory genes as-  
263 sociated with different age groups and serotype categories. Bonferroni adjustment  
264 was done to control for multiple testing and no genes were associated with specific  
265 age group (Fig 7d) but as expected many genes ( $\approx 400$ ) were associated with differ-  
266 ent serotype categories (Fig 7e). Forty-two accessory genes showed significant change  
267 in frequency post-vaccination, of which approximately half (52.38%) increased post-  
268 vaccination (Table 1, Fig 7f, S9 Table). The accessory genes that increased post-  
269 vaccination encoded for a glycosyl transferase (odds ratio[OR]=3.34,  $P=9.71\times 10^{-6}$ ),  
270 bacteriolysin family protein (OR=3.34,  $P=3.46\times 10^{-5}$ ), type I restriction modifica-  
271 tion system (RMS) R subunit (OR=3.34,  $P=3.46\times 10^{-5}$ ) and other diverse functions  
272 including sugar transport, MGE and phage activity. Conversely, genes whose fre-  
273 quency decreased were associated with bacteriocin gene *blpQ* (OR=0.19,  $P=5.20\times 10^{-6}$ )  
274 and other genes associated with bacteriocins, conjugative elements, two-component  
275 systems and phages (all  $OR\approx 0.41$ ,  $P<1.52\times 10^{-2}$ ). Interestingly, a capsule biosyn-



thesis gene (*wzx*) encoding a repeating unit of a flippase protein also showed a decreasing frequency (OR=0.43,  $P=0.042$ ). Other genes with significant changes in frequency encoded proteins with a diverse functional repertoire but notably included MGEs [phages/transposase/insertion elements] (11/42), bacteriocins (3/42), RMS systems (2/42) and competence (2/42), which have been recently implicated to play a role in negative frequency dependent selection (NFDS) [25]. These findings indicate that PCV has perturbed pneumococcal population not only at serotype level but also accessory genome level.

## Discussion

The evolution of the pneumococcus in carriage is ever-changing therefore sampling this niche provides unrivalled opportunities to monitor and keep track of ongoing genomic adaptations over-time [5, 7]. Our genomic study demonstrates this by demonstrating changes in pneumococcal population structure following the introduction of PCV vaccine in previously vaccine-naïve low-income setting where, unlike in higher income settings such information is usually unavailable despite higher disease burden [26]. In contrast from other studies, our dataset is unique because it includes strains from both children and adults, which provides a more an opportunity to investigate PCV-induced population structuring in both vaccine-eligible and ineligible individuals. Our findings reveal changes at serotype, lineage and accessory genome level caused by vaccine-induced population restructuring specifically due to substantial clearance of VT serotypes in vaccinated under-five population but not unvaccinated over-five population. This reflects a direct consequence of PCV but limited and possibly delayed indirect protection in contrast to other settings e.g. UK where population herd immunity is higher albeit epidemiological differences with our population [3, 10]. Further ongoing and future studies will investigate factors mitigating herd effects, which may include higher HIV burden and vaccine scheduling. Lineage-specific changes revealed subtle serotype dynamics associated with clearance, clonal expansion and emergence of serotypes. Furthermore, while there was no change in the accessory gene pool associated with antibiotic resistance, there significant changes in other genes typically those encoding MGEs and bacteriocins. Additional statistical modelling shows that other accessory genes have undergone significant changes in frequency due to the population perturbations, which could be temporary and may return to equilibrium gene frequency due to NFDS [25]. Altogether, these findings reveal an early impact of PCV on serotype and lineage distribution, and accessory

310 gene dynamics in pneumococcal carriage post-vaccination.

311

312 The impact of PCV is shown by the reduction in frequency of VT serotypes, which  
313 occurred only in the largely vaccinated under-five population but not older and un-  
314 vaccinated individuals. This implied high direct impact but limited indirect pro-  
315 tection via herd immunity. While the frequency of VTs was higher in under-fives  
316 than over-fives, following vaccination these converged to the same amount (33%) but  
317 whether this is coincidental or represents some unknown phenomena threshold for  
318 VT frequency in the population remains unknown. Further assessment of Simpson  
319 diversity in serotype composition in VT and NVT strains provided further insights  
320 on the strain dynamics. Firstly, the Simpson diversity for ST composition remained  
321 largely unchanged post-vaccination [27, 28]. This suggests PCV did not significantly  
322 disrupt the ST composition in a similar fashion to the way it did for serotype com-  
323 position possibly because of higher ( $\approx 3$  times) saturation of STs than serotypes in  
324 pneumococcal population. Secondly, there was an increase of the diversity in NVT  
325 strains after vaccination albeit not statistically significant but serotype diversity was  
326 not restored to the levels observed pre-vaccination before clearance of VT serotypes,  
327 which implied that serotype replacement was incomplete. How serotype replacement  
328 in our setting will compare with other settings where settings remains to be fully  
329 understood once the population has reached a new equilibrium and replacement is  
330 complete.

331

332 Consistent with data from other settings [13], the observed modest serotype replace-  
333 ment has been driven by clonal expansion of extant serotypes prior to vaccination,  
334 which were masked due to competition by their VT counterparts. Unlike post-PCV7  
335 introduction where serotype 19A was the dominant replacement serotype, in our set-  
336 ting replacement is driven by multiple serotypes including serotype 7C, 23A, 15B/C  
337 and 28F rather than a single dominant NVT clone. Furthermore, while certain capsule-  
338 switched strains were detected post-vaccination but whether these occurred post-  
339 vaccination due to vaccine pressure is unknown but there was evidence that the ma-  
340 jority of these were likely extant prior to vaccination but at undetectable frequencies  
341 such as the serotype 9V to 28F vaccine-escape capsule-switched strains. Emergence  
342 of novel serotypes post-vaccination was uncommon with only serotype 28F detected  
343 post-vaccination only but this clone showed high sequence diversity and was not ge-  
344 netically similar to strains from other countries suggesting not only no recent impor-  
345 tation post-vaccination but also circulation at undetectable levels prior to vaccina-

346 tion. Further studies are needed to assess the degree with which such replacement  
347 serotypes will cause disease in our setting and globally [29]. Taken together, these  
348 findings suggest there is incomplete serotype replacement in our setting after two  
349 years from PCV introduction mostly in under-fives compared to older age groups.

350  
351 Clinically, the stability of the antibiotic resistance rates is not concerning consid-  
352 ering that resistance rates were already lower than in IPD [19, 21, 30]. However,  
353 consistent with findings elsewhere [31, 32], the significant decrease of intermediate-  
354 penicillin resistance rate exemplifies the advantages of PCVs when strategically har-  
355 nessed to thwart further emergence and expansion of clones with intermediate re-  
356 sistance to antimicrobials before they higher resistance is achieved [31]. While the  
357 accessory gene pool associated with antibiotic resistance did not change significantly,  
358 the changes detected in other accessory genes using logistic regression signaled that  
359 the pneumococcal population has been perturbed and these could likely indicate  
360 genes with the potential to drive NFDS. The perturbed-frequency genes revealed  
361 diverse functions with the majority associated with MGEs possibly reflecting their  
362 rapid mobility between pneumococcal strains. Other genes were associated with cap-  
363 sule biosynthesis (*wzx*) while those encoding for bacteriocin activity associated pro-  
364 teins important in mediating strain competition dynamics were also possibly un-  
365 der selection [33, 34]. These finding provide a clear evidence that PCV has induced  
366 population changes not only at serotype but also accessory genome level but these  
367 changes did not seemingly favour higher antibiotic resistance. The resultant pheno-  
368 typic changes associated with the perturbed accessory genes and allelic variation in  
369 the core gene previously shown to drive metabolic shifts in strains post-vaccination  
370 warrants further investigation [35].

371  
372 We have provided clear evidence of vaccine-induced perturbed pneumococcal pop-  
373 ulation at serotype, lineage and accessory genome level after only two years follow-  
374 ing the introduction of PCV in a pneumococcal vaccine-naïve setting in Northern  
375 Malawi. This reflects a PCV impact, which is largely restricted to vaccinated under-  
376 fives but not unvaccinated older individuals highlighting limited manifestation of  
377 population herd immunity. Our data is timely and improves our understanding of  
378 the impact of PCV on pneumococcal population structure in high-disease burden  
379 but low-income settings. Our data revealed a perturbed pneumococcal carriage pop-  
380 ulation after two years from PCV introduction but continued assiduous surveillance  
381 and WGS remain crucial to adequately monitor long-term effects of PCV particu-

382 larly after the equilibrium population dynamics have been re-established. Together  
383 with findings gained from surveillance and clinical trials of PCVs across SSA and  
384 globally, our findings will inform future conjugate vaccine design strategies and how  
385 their beneficial effects can be maximised especially in the most vulnerable tropical  
386 populations.

## 387 **Materials and methods**

### 388 **Study population and isolate selection**

389 A subset of 660 pneumococcal isolates collected through multiple household surveys  
390 were selected for WGS (S1 Data). These isolates were obtained from nasopharyngeal  
391 carriage in healthy children and adults in Karonga district of northern Malawi be-  
392 fore vaccination in 2009 (n=370) and 2010 (n=112), and two years after vaccination  
393 in 2014 (n=178) were selected for WGS. The strains were representative of nasopha-  
394 ryngeal swabs and were samples from individuals from different age groups. By age  
395 group, 376 strains were sampled from the under-fives (<5 years old) and 130 strains  
396 from over-fives ( $\geq 5$  years old) before vaccination while 106 and 48 strains were ob-  
397 tained from under-fives and over-fives post-vaccination. The nasal swabs were stored  
398 and processed as previously described [36]. The ethical approvals for the study were  
399 granted by National Health Sciences Research Committee in Malawi (NHSRC 490)  
400 and University of Malawi College of Medicine Research Ethics Committee (P.O8/14/1614).

### 401 **Genomic DNA preparation and sequencing**

402 Genomic DNA extraction was done using QIAamp DNA mini kit (Qiagen, Hilden,  
403 Germany), QIAgen Biorobot (Qiagen, Hilden, Germany) and Wizard<sup>®</sup> DNA Ge-  
404 nomic DNA Purification Kit (Promega, Wisconsin, USA) as previously described  
405 [37]. Preparation of genomic DNA libraries and sequencing was done at Wellcome  
406 Sanger Institute using Illumina Genome Analyzer II and HiSeq platforms (Illumina,  
407 CA, USA). The length of reads ranged between 100 and 125 bases (median: 100)  
408 with a mean quality of 35.32 (S1 Fig) while mean number of mapped reads was 4,068,781  
409 reads per isolate (S2 Fig). De novo sequence assemblies were generated using a pipeline  
410 [38], which uses Velvet v1.2.09 [39] and VelvetOptimiser v2.2.5 [40] (k-mers between  
411 66.0% to 90.0% of the read length) to assemble reads, SSPACE Basic v2.0 [41] for  
412 assembly scaffolding ( $\approx 16$  iterations), GapFiller v1.10 [42] for assembly gap closing  
413 and SMALT v0.7.4 ([www.sourceforge.net/projects/smalt/](http://www.sourceforge.net/projects/smalt/)) to re-map reads to the

414 assembly. The mean genome size, contig length and number of contigs were 2,125,143bp,  
415 54,071bp and 48 contigs respectively while the mean N50 values was 129,431bp (S3,4  
416 Fig). The sequence reads were deposited in the European Nucleotide Archive (S1  
417 Data).

## 418 **Capsule and sequence typing**

419 The capsule types (serotypes) were defined using an *in silico* typing approach [43],  
420 which maps short sequence reads against reference sequences of the capsule-encoding  
421 polysaccharide synthesis (CPS) loci, which determines serotypes based antibody bind-  
422 ing to its antigens [44]. The sequence types (ST) were inferred from assemblies based  
423 on loci of seven housekeeping genes for pneumococcal multilocus sequence typing  
424 (MLST) scheme [45] using MLSTcheck [46].

## 425 **Presence of antibiotic resistance genes**

426 The presence of antibiotic resistance genes for different antibiotics (tetracycline, chlo-  
427 ramphenicol and erythromycin) and mobile genetic elements that disseminate them  
428 were investigated using nucleotide-BLAST v2.2.30 [47] with E-value of <0.001, se-  
429 quence coverage >80% and nucleotide identity >80%. For penicillin whose resistance  
430 is caused by chromosomal mutations unlike genes disseminated by mobile genetic el-  
431 ements (MGE), the minimum inhibitory concentrations (MIC) were genotypically  
432 predicted using a robust analysis pipeline developed by the Centers for Disease Con-  
433 trol and Prevention (CDC), which uses allelic variation in the transpeptidase domain  
434 of the penicillin binding proteins (PBP) - PBP1a, PBP2b and PBP2x to infer MICs  
435 [22]. The inferred MICs were translated into binary resistant-susceptible phenotype  
436 using the British Society for Antimicrobial Chemotherapy (BSAC) breakpoint [48].

## 437 **Gene annotation, alignment and population structure**

438 The sequenced and assembled genomes were annotated using Prokka v1.11 [49]. We  
439 identified core and accessory genes, present in  $\geq 99\%$  and  $< 99\%$  of the strains respec-  
440 tively, by clustering coding sequences using Roary v3.6.1 pan-genome pipeline [50].  
441 The core- and pan-genome were comprised of 660 and 9,472 genes respectively and  
442 a 1,050,021bp core-genome alignment with 88,961bp single nucleotide polymorphism  
443 (SNP) positions identified using Snp-Sites v2.3.2 [51] was generated from Roary anal-  
444 ysis (S5 Fig). The core SNPs were clustered into genomic clusters (GCs) using the

445 hierarchical clustering module (hierBAPS) in BAPS v6.0 [18]. DNA sequence trans-  
446 lation and format conversion was done using BioPython [52] while nucleotide-BLAST  
447 v2.2.30 [47] and ACT v13.0.0 [53] was used for sequence comparison.

## 448 **Phylogenetic tree construction**

449 Maximum likelihood phylogenetic trees of the strains was constructed from the core  
450 gene alignment using FastTree-SSE3 v2.1.3 [54]. The GC or lineage-specific trees  
451 were constructed using RAxML v7.0.4 [55] from whole genome alignments after re-  
452 moving regions with putative recombination events using Gubbins v1.4.10 [56]. The  
453 phylogenetic trees were generated using a general time reversible (GTR) model [57],  
454 Gamma heterogeneity between nucleotide sites [58] and 100 bootstrap replicates pa-  
455 rameters [59]. The phylogenetic tree was rooted at the midpoint of the branch sep-  
456 arating most divergent strains. Visualisation of the tree Together with the strain's  
457 metadata was done using iTol v2.1 [60].

## 458 **Statistical analysis**

459 The changes in frequency of serotypes, antibiotic resistance and accessory genome  
460 content were assessed using Fisher's Exact test. Odds ratios for detecting GCs and  
461 serotypes pre- and post-vaccination were determined (pseudo-counts of 1 to avoid  
462 division by zeros). Changes in the composition of serotypes and STs were detected  
463 by using Simpson diversity index and the *P*-values were detected by resampling us-  
464 ing Jackknife approach ([www.comparingpartitions.info](http://www.comparingpartitions.info)). Logistic regression was used  
465 to assess changes in gene presence-absence patterns of the intermediate frequency  
466 accessory genes (present at frequency from 5% to 95%) before and after vaccina-  
467 tion while controlling for the effects of age group and serotype category. The refer-  
468 ence levels for each variable in the regression were as follows: 'pre-vaccination' for  
469 sampling period, 'over-five' for age group and 'NVT' for serotype category. The es-  
470 timated coefficients for each variable were extracted and summarised and *P*-values  
471 were for each gene were adjusted using Bonferroni correction to account for multiple  
472 comparisons. The statistical analysis was done using R v3.1.2 (R Core Team, 2013),  
473 GraphPad Prism v7.0 (GraphPad Software, California, USA) and Python v2.7.9  
474 (Python Software Foundation).

## 475 **Ethics statement**

476 Written informed consent was obtained from adults while parents, guardians and  
477 caregivers of child participants. The ethical approvals for the study were granted by  
478 National Health Sciences Research Committee in Malawi (approval #: NHSRC 490  
479 and 1232), the London School of Hygiene and Tropical Medicine (approval #5345)  
480 and the University of Liverpool (approval #: 670) and University of Malawi College  
481 of Medicine Research Ethics Committee (approval #: P.O8/14/1614). Nasopharyn-  
482 geal swabs were collected from healthy children and adults as previously described  
483 and the samples were de-identified in the analysis.

## 484 **Author contributions**

485 C.C., N.F., D.B.E. and S.D.B. conceived and designed the study. N.F., D.B.E. and  
486 S.D.B. supervised the study. N.F., D.B.E., L.M., R.F.B. and S.D.B. secured funding.  
487 E.H., T.T. and N.F. collected samples. M.A., A.W.K., J.E.C. and C.P. performed  
488 molecular and microbiology experiments. S.D.B. supervised whole genome sequenc-  
489 ing and genomic analysis. C.C. and R.A.G. checked quality of the sequence assem-  
490 blies. C.C. performed genomic and statistical analyses. P.M. assisted with data anal-  
491 ysis and interpretation. C.C. and S.D.B. wrote initial draft of the paper. L.M., R.F.B.,  
492 A.K., W.P.H. and R.S.H. contributed to data interpretation. All authors contributed  
493 to writing and reviewing of the paper.

## 494 **Competing interests**

495 The authors declare no competing financial interests.

## 496 **Acknowledgements**

497 We acknowledge work by clinical and laboratory staff at Malawi Epidemiology and  
498 Intervention Research Unit (MEIRU) and Malawi-Liverpool-Wellcome Trust Clin-  
499 ical Research Programme (MLW) who collected and prepared the samples respec-  
500 tively, and sequencing and informatics teams at Wellcome Sanger Institute. This  
501 work was funded by Bill and Melinda Gates Foundation (grant #OPP1034556) and  
502 Wellcome UK (grant #084679/Z/08/Z). C.C. acknowledge PhD studentship funding  
503 from Commonwealth Scholarship Commission. The contents of this paper are solely

504 responsibility of the authors and does not necessarily represent official views of their  
505 affiliated institutions and funding agencies.

## 506 References

- 507 1. Ben-Shimol, S. *et al.* Impact of Widespread Introduction of Pneumococcal Con-  
508 jugate Vaccines on Pneumococcal and Nonpneumococcal Otitis Media. *Clin In-*  
509 *fect Dis* **63**, 611–8. ISSN: 1058-4838 (2016).
- 510 2. Whitney, C. G. *et al.* Decline in Invasive Pneumococcal Disease after the Intro-  
511 duction of Protein–Polysaccharide Conjugate Vaccine. *New England Journal of*  
512 *Medicine* **348**, 1737–1746. ISSN: 0028-4793 (2003).
- 513 3. Miller, E., Andrews, N. J., Waight, P. A., Slack, M. P. & George, R. C. Herd  
514 immunity and serotype replacement 4 years after seven-valent pneumococcal  
515 conjugate vaccination in England and Wales: an observational cohort study.  
516 *Lancet Infect Dis* **11**, 760–8. ISSN: 1473-3099 (2011).
- 517 4. Gordon, S. B. *et al.* Poor potential coverage for 7-valent pneumococcal conju-  
518 gate vaccine, Malawi. *Emerg Infect Dis* **9**, 747–9. ISSN: 1080-6040 (Print) 1080-  
519 6040 (2003).
- 520 5. Gottberg, A. *et al.* Effects of vaccination on invasive pneumococcal disease in  
521 South Africa. *N Engl J Med* **371**. doi:10.1056/NEJMoa1401914. [http://dx.doi.](http://dx.doi.org/10.1056/NEJMoa1401914)  
522 [org/10.1056/NEJMoa1401914](http://dx.doi.org/10.1056/NEJMoa1401914) (2014).
- 523 6. Moore, M. R. *et al.* Effect of use of 13-valent pneumococcal conjugate vaccine  
524 in children on invasive pneumococcal disease in children and adults in the USA:  
525 analysis of multisite, population-based surveillance. *Lancet Infect Dis*. ISSN:  
526 1473-3099. doi:10.1016/S1473-3099(14)71081-3. [http://ac.els-cdn.com/](http://ac.els-cdn.com/S1473309914710813/1-s2.0-S1473309914710813-main.pdf)  
527 [S1473309914710813/1-s2.0-S1473309914710813-main.pdf](http://ac.els-cdn.com/S1473309914710813/1-s2.0-S1473309914710813-main.pdf) (2015).
- 528 7. Hammitt, L. L. *et al.* Population effect of 10-valent pneumococcal conjugate  
529 vaccine on nasopharyngeal carriage of *Streptococcus pneumoniae* and non-typeable  
530 *Haemophilus influenzae* in Kilifi, Kenya: findings from cross-sectional carriage  
531 studies. *Lancet Glob Health* **2**. doi:10.1016/S2214-109X(14)70224-4. [http:](http://dx.doi.org/10.1016/S2214-109X(14)70224-4)  
532 [//dx.doi.org/10.1016/S2214-109X\(14\)70224-4](http://dx.doi.org/10.1016/S2214-109X(14)70224-4) (2014).
- 533 8. Mackenzie, G. A. *et al.* Effect of the introduction of pneumococcal conjugate  
534 vaccination on invasive pneumococcal disease in The Gambia: a population-  
535 based surveillance study. *Lancet Infect Dis* **16**, 703–11. ISSN: 1473-3099 (2016).



- 536 9. Cohen, C. *et al.* Effectiveness of the 13-valent pneumococcal conjugate vaccine  
537 against invasive pneumococcal disease in South African children: a case-control  
538 study. *The Lancet Global Health*. ISSN: 2214-109X. doi:10.1016/S2214-109X(17)  
539 30043-8. [http://dx.doi.org/10.1016/S2214-109X\(17\)30043-8](http://dx.doi.org/10.1016/S2214-109X(17)30043-8)  
540 [http://www.thelancet.com/pdfs/journals/langlo/PIIS2214-109X\(17\)30043-8.pdf](http://www.thelancet.com/pdfs/journals/langlo/PIIS2214-109X(17)30043-8.pdf) (2017).
- 541 10. Van Hoek, A. J. *et al.* Pneumococcal carriage in children and adults two years  
542 after introduction of the thirteen valent pneumococcal conjugate vaccine in  
543 England. *Vaccine* **32**, 4349–55. ISSN: 0264-410x (2014).
- 544 11. Brugger, S. D., Frey, P., Aebi, S., Hinds, J. & Muhlemann, K. Multiple colo-  
545 nization with *S. pneumoniae* before and after introduction of the seven-valent  
546 conjugated pneumococcal polysaccharide vaccine. *PLoS One* **5**, e11638. ISSN:  
547 1932-6203 (2010).
- 548 12. Dunne, E. M. *et al.* Effect of pneumococcal vaccination on nasopharyngeal car-  
549 riage of *Streptococcus pneumoniae*, *Haemophilus influenzae*, *Moraxella catarrhalis*,  
550 and *Staphylococcus aureus* in Fijian children. *J Clin Microbiol* **50**, 1034–8.  
551 ISSN: 0095-1137 (2012).
- 552 13. Croucher, N. J. *et al.* Population genomics of post-vaccine changes in pneumo-  
553 coccal epidemiology. *Nat Genet* **45**, 656–63. ISSN: 1546-1718 (2013).
- 554 14. Gladstone, R. A. *et al.* Five winters of pneumococcal serotype replacement in  
555 UK carriage following PCV introduction. *Vaccine* **33**, 2015–21. ISSN: 0264-410x  
556 (2015).
- 557 15. Weinberger, D. M., Malley, R. & Lipsitch, M. Serotype replacement in disease  
558 following pneumococcal vaccination: A discussion of the evidence. *Lancet* **378**,  
559 1962–1973. ISSN: 0140-6736 1474-547X (2011).
- 560 16. Bar-Zeev, N. *et al.* Methods and challenges in measuring the impact of national  
561 pneumococcal and rotavirus vaccine introduction on morbidity and mortality in  
562 Malawi. *Vaccine* **33**, 2637–45. ISSN: 0264-410x (2015).
- 563 17. Wyres, K. L. *et al.* Pneumococcal Capsular Switching: A Historical Perspective.  
564 *Journal of Infectious Diseases* **207**, 439–449 (2013).
- 565 18. Cheng, L., Connor, T. R., Sirén, J., Aanensen, D. M. & Corander, J. Hierar-  
566 chical and spatially explicit clustering of DNA sequences with BAPS software.  
567 *Molecular Biology and Evolution*. doi:10.1093/molbev/mst028. <http://mbe.oxfordjournals.org/content/early/2013/02/13/molbev.mst028.abstract>  
568 <http://mbe.oxfordjournals.org/content/30/5/1224.full.pdf> (2013).  
569

- 570 19. Chaguza, C. *et al.* Population genetic structure, antibiotic resistance, capsule  
571 switching and evolution of invasive pneumococci before conjugate vaccination  
572 in Malawi. *Vaccine*. ISSN: 0264-410X. doi:doi.org/10.1016/j.vaccine.2017.07.009.  
573 <http://www.sciencedirect.com/science/article/pii/S0264410X17309052>  
574 <http://ac.els-cdn.com/S0264410X17309052/1-s2.0-S0264410X17309052-main.pdf>  
575 (2017).
- 576 20. Croucher, N., Harris, S., Fraser, C. & Quail, M. Rapid pneumococcal evolution  
577 in response to clinical interventions. *Science* **331**. doi:10.1126/science.1198545.  
578 <http://dx.doi.org/10.1126/science.1198545> (2011).
- 579 21. Everett, D. B. *et al.* Ten years of surveillance for invasive *Streptococcus pneu-*  
580 *moniae* during the era of antiretroviral scale-up and cotrimoxazole prophylaxis  
581 in Malawi. *PLoS One* **6**, e17765. ISSN: 1932-6203 (Electronic) 1932-6203 (Link-  
582 ing) (2011).
- 583 22. Li, Y. *et al.* Penicillin-Binding Protein Transpeptidase Signatures for Tracking  
584 and Predicting  $\beta$ -Lactam Resistance Levels in *Streptococcus pneumoniae*. *mBio*  
585 **7**. doi:10.1128/mBio.00756-16. [http://mbio.asm.org/content/7/3/e00756-](http://mbio.asm.org/content/7/3/e00756-16)  
586 [16.abstracthttp://mbio.asm.org/content/7/3/e00756-16.full.pdf](http://mbio.asm.org/content/7/3/e00756-16.full.pdf) (2016).
- 587 23. Henriques-Normark, B. & Normark, S. Bacterial vaccines and antibiotic resis-  
588 tance. *Ups J Med Sci* **119**, 205–8. ISSN: 0300-9734 (2014).
- 589 24. Xu, X. *et al.* Distribution of Serotypes, Genotypes, and Resistance Determi-  
590 nants among Macrolide-Resistant *Streptococcus pneumoniae* Isolates. *Antimi-*  
591 *crobial Agents and Chemotherapy* **54**, 1152–1159. ISSN: 0066-4804 1098-6596  
592 (2010).
- 593 25. Corander, J. *et al.* Frequency-dependent selection in vaccine-associated pneu-  
594 mococcal population dynamics. *Nature Ecology & Evolution*. ISSN: 2397-334X.  
595 doi:10.1038/s41559-017-0337-x. <https://doi.org/10.1038/s41559-017-0337-x>  
596 (2017).
- 597 26. O'Brien, K. L. *et al.* Burden of disease caused by *Streptococcus pneumoniae*  
598 in children younger than 5 years: global estimates. *Lancet* **374**, 893–902. ISSN:  
599 1474-547X (Electronic) 0140-6736 (Linking) (2009).
- 600 27. Chang, Q. *et al.* Stability of the pneumococcal population structure in Mas-  
601 sachusetts as PCV13 was introduced. *BMC Infect Dis* **15**, 68. ISSN: 1471-2334  
602 (Electronic) 1471-2334 (Linking) (2015).

- 603 28. Azarian, T. *et al.* The impact of serotype-specific vaccination on phylodynamic  
604 parameters of *Streptococcus pneumoniae* and the pneumococcal pan-genome.  
605 *PLoS Pathog* **14**, e1006966. ISSN: 1553-7366 (2018).
- 606 29. Masala, G. L., Lipsitch, M., Bottomley, C. & Flasche, S. Exploring the role  
607 of competition induced by non-vaccine serotypes for herd protection following  
608 pneumococcal vaccination. *J R Soc Interface* **14**. ISSN: 1742-5662. doi:10.1098/  
609 rsif.2017.0620. [http://rsif.royalsocietypublishing.org/content/royinterface/14/  
610 136/20170620.full.pdf](http://rsif.royalsocietypublishing.org/content/royinterface/14/136/20170620.full.pdf) (2017).
- 611 30. Musicha, P. *et al.* Trends in antimicrobial resistance in bloodstream infection  
612 isolates at a large urban hospital in Malawi (1998-2016): a surveillance study.  
613 *Lancet Infect Dis* **17**, 1042–1052. ISSN: 1473-3099 (2017).
- 614 31. Su, L.-H. *et al.* Evolving pneumococcal serotypes and sequence types in rela-  
615 tion to high antibiotic stress and conditional pneumococcal immunization. *Sci-*  
616 *entific Reports* **5**, 15843. ISSN: 2045-2322 (2015).
- 617 32. Kyaw, M. H. *et al.* Effect of introduction of the pneumococcal conjugate vac-  
618 cine on drug-resistant *Streptococcus pneumoniae*. *N Engl J Med* **354**, 1455–63.  
619 ISSN: 1533-4406 (Electronic) 0028-4793 (Linking) (2006).
- 620 33. Son, M. R. *et al.* Conserved mutations in the pneumococcal bacteriocin trans-  
621 porter gene, *blpA*, result in a complex population consisting of producers and  
622 cheaters. *MBio* **2**. doi:10.1128/mBio.00179-11 (2011).
- 623 34. Dawid, S., Roche, A. M. & Weiser, J. N. The *blp* bacteriocins of *Streptococcus*  
624 *pneumoniae* mediate intraspecies competition both in vitro and in vivo. *Infect*  
625 *Immun* **75**, 443–51. ISSN: 0019-9567 (Print) 0019-9567 (2007).
- 626 35. Watkins, E. R. *et al.* Vaccination Drives Changes in Metabolic and Virulence  
627 Profiles of *Streptococcus pneumoniae*. *PLoS Pathog* **11**, e1005034. ISSN: 1553-  
628 7366 (2015).
- 629 36. Heinsbroek, E. *et al.* Pneumococcal Acquisition Among Infants Exposed to  
630 HIV in Rural Malawi: A Longitudinal Household Study. *American Journal of*  
631 *Epidemiology* **183**, 70–78. ISSN: 0002-9262 1476-6256 (2016).
- 632 37. Everett, D. B. *et al.* Genetic characterisation of Malawian pneumococci prior  
633 to the roll-out of the PCV13 vaccine using a high-throughput whole genome  
634 sequencing approach. *PLoS One* **7**. doi:10.1371/journal.pone.0044250. <http://dx.doi.org/10.1371/journal.pone.0044250>  
635 (2012).

- 636 38. Page, A. J. *et al.* Robust high-throughput prokaryote de novo assembly and  
637 improvement pipeline for Illumina data. *Microbial Genomics* **2**. doi:doi:10.  
638 1099/mgen.0.000083. [http://mgen.microbiologyresearch.org/content/journal/  
639 mgen/10.1099/mgen.0.000083](http://mgen.microbiologyresearch.org/content/journal/mgen/10.1099/mgen.0.000083) (2016).
- 640 39. Zerbino, D. & Birney, E. Velvet: Algorithms for de novo short read assembly  
641 using de Bruijn graphs. *Genome Res* **18**, 821–829 (2008).
- 642 40. Zerbino, D. R. Using the Velvet de novo assembler for short-read sequencing  
643 technologies. *Curr Protoc Bioinformatics* **Chapter 11**, Unit 11 5. ISSN: 1934-  
644 340X (Electronic) 1934-3396 (Linking) (2010).
- 645 41. Boetzer, M., Henkel, C. V., Jansen, H. J., Butler, D. & Pirovano, W. Scaffold-  
646 ing pre-assembled contigs using SSPACE. *Bioinformatics* **27**, 578–9. ISSN: 1367-  
647 4811 (Electronic) 1367-4803 (Linking) (2011).
- 648 42. Nadalin, F., Vezzi, F. & Policriti, A. GapFiller: a de novo assembly approach to  
649 fill the gap within paired reads. *BMC Bioinformatics* **13**, S8. ISSN: 1471-2105  
650 (2012).
- 651 43. Epping, L. *et al.* SeroBA: rapid high-throughput serotyping of *Streptococcus*  
652 *pneumoniae* from whole genome sequence data. *Microb Genom.* ISSN: 2057-  
653 5858. doi:10.1099/mgen.0.000186. [http://www.microbiologyresearch.org/  
654 docserver/fulltext/mgen/mgen.000186.zip/mgen000186.pdf](http://www.microbiologyresearch.org/docserver/fulltext/mgen/mgen.000186.zip/mgen000186.pdf) (2018).
- 655 44. Bentley, S. *et al.* Genetic analysis of the capsular biosynthetic locus from all 90  
656 pneumococcal serotypes. *PLoS Genet* **2**. doi:10.1371/journal.pgen.0020031.  
657 <http://dx.doi.org/10.1371/journal.pgen.0020031> (2006).
- 658 45. Enright, M. C. & Spratt, B. G. A multilocus sequence typing scheme for *Strep-*  
659 *tococcus pneumoniae*: identification of clones associated with serious invasive  
660 disease. *Microbiology* **144** ( Pt 11), 3049–60. ISSN: 1350-0872 (Print) 1350-  
661 0872 (1998).
- 662 46. Page, A., Taylor, B. & Keane, J. Multilocus sequence typing by blast from de  
663 novo assemblies against PubMLST. *The Journal of Open Source Software* **1**.  
664 doi:doi:10.21105/joss.00118. <http://dx.doi.org/10.21105/joss.00118> (2016).
- 665 47. Altschul, S. *et al.* Gapped BLAST and PSI-BLAST: a new generation of pro-  
666 tein database search programs. *Nucleic Acids Res* **25**, 3389–3402 (1997).
- 667 48. Andrews, J. M. BSAC standardized disc susceptibility testing method. *J An-*  
668 *timicrob Chemother* **48 Suppl 1**, 43–57. ISSN: 0305-7453 (Print) 0305-7453  
669 (2001).

- 670 49. Seemann, T. Prokka: rapid prokaryotic genome annotation. *Bioinformatics* **30**,  
671 2068–9. ISSN: 1367-4803 (2014).
- 672 50. Page, A. J. *et al.* Roary: rapid large-scale prokaryote pan genome analysis. *Bioin-*  
673 *formatics* **31**, 3691–3. ISSN: 1367-4803 (2015).
- 674 51. Page, A. J. *et al.* SNP-sites: rapid efficient extraction of SNPs from multi-FASTA  
675 alignments. *Microbial Genomics* **2**. doi:doi:10.1099/mgen.0.000056. [http://](http://mgen.microbiologyresearch.org/content/journal/mgen/10.1099/mgen.0.000056)  
676 [mgen.microbiologyresearch.org/content/journal/mgen/10.1099/mgen.0.000056](http://mgen.microbiologyresearch.org/content/journal/mgen/10.1099/mgen.0.000056)  
677 (2016).
- 678 52. Cock, P. J. *et al.* Biopython: freely available Python tools for computational  
679 molecular biology and bioinformatics. *Bioinformatics* **25**, 1422–3. ISSN: 1367-  
680 4811 (Electronic) 1367-4803 (Linking) (2009).
- 681 53. Carver, T. *et al.* ACT: the Artemis comparison tool. *Bioinformatics* **21**, 3422  
682 –3423 (2005).
- 683 54. Price, M. N., Dehal, P. S. & Arkin, A. P. FastTree: Computing Large Minimum  
684 Evolution Trees with Profiles instead of a Distance Matrix. *Molecular Biology*  
685 *and Evolution* **26**, 1641–1650 (2009).
- 686 55. Stamatakis, A. RAxML-VI-HPC: maximum likelihood-based phylogenetic anal-  
687 yses with thousands of taxa and mixed models. *Bioinformatics* **22**, 2688 –2690  
688 (2006).
- 689 56. Croucher, N. J. *et al.* Rapid phylogenetic analysis of large samples of recomb-  
690 nant bacterial whole genome sequences using Gubbins. *Nucleic Acids Research*.  
691 doi:10.1093/nar/gku1196. [http://nar.oxfordjournals.org/content/early/2014/](http://nar.oxfordjournals.org/content/early/2014/11/20/nar.gku1196.abstract)  
692 [11/20/nar.gku1196.abstract](http://nar.oxfordjournals.org/content/early/2014/11/20/nar.gku1196.abstract)[http://nar.oxfordjournals.org/content/early/2014/](http://nar.oxfordjournals.org/content/early/2014/11/20/nar.gku1196.full.pdf)  
693 [11/20/nar.gku1196.full.pdf](http://nar.oxfordjournals.org/content/early/2014/11/20/nar.gku1196.full.pdf) (2014).
- 694 57. Tavaré, S. in *American Mathematical Society: Lectures on Mathematics in the*  
695 *Life Sciences* 57–86 (Amer Mathematical Society, 1986). ISBN: 0821811673.  
696 doi:citeulike-article-id:4801403. [http://www.amazon.ca/exec/obidos/redirect?](http://www.amazon.ca/exec/obidos/redirect?tag=citeulike09-20&path=ASIN/0821811673)  
697 [tag=citeulike09-20&path=ASIN/0821811673](http://www.amazon.ca/exec/obidos/redirect?tag=citeulike09-20&path=ASIN/0821811673).
- 698 58. Yang, Z. Maximum-likelihood estimation of phylogeny from DNA sequences  
699 when substitution rates differ over sites. *Mol Biol Evol* **10**, 1396–401. ISSN: 0737-  
700 4038 (Print) 0737-4038 (1993).
- 701 59. Felsenstein, J. Confidence limits on phylogenies: An approach using the boot-  
702 strap. *Evolution* **39**, 783–791. ISSN: 0014-3820 (1985).

- 703 60. Letunic, I. & Bork, P. Interactive Tree Of Life v2: online annotation and dis-  
704 play of phylogenetic trees made easy. *Nucleic Acids Research* **39**, W475–W478  
705 (2011).

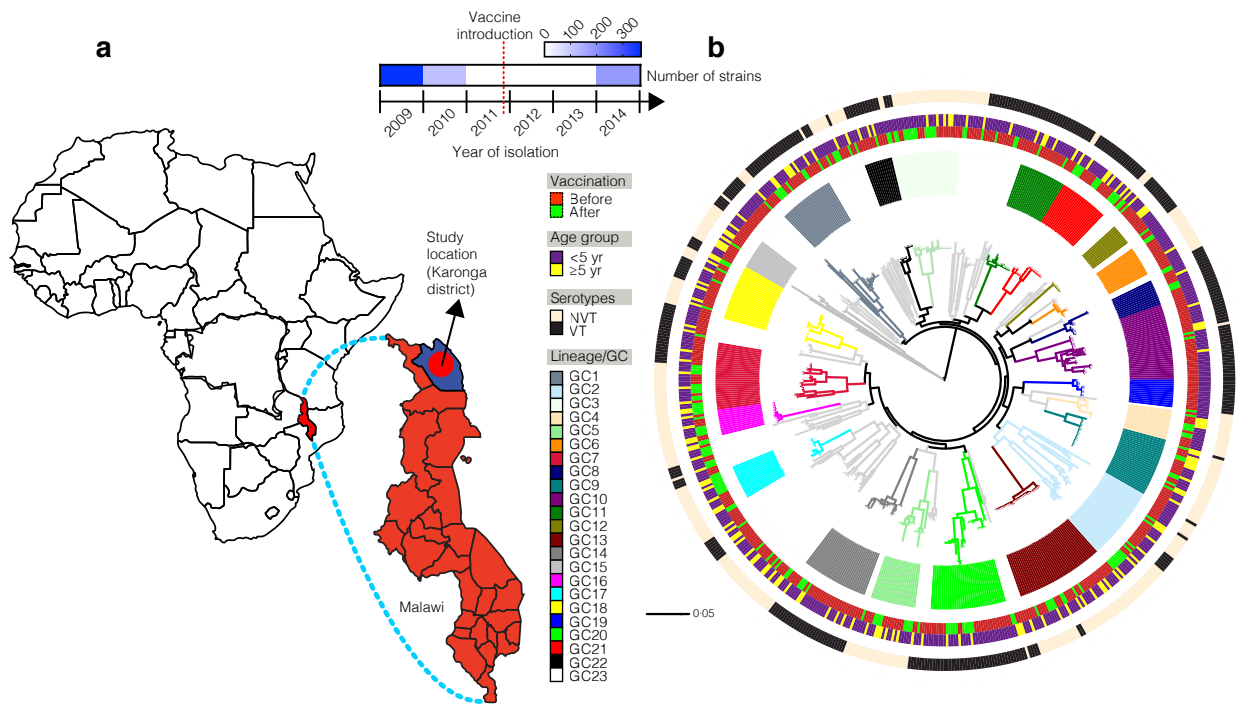

**Fig 1:** Core gene maximum likelihood phylogeny of carried pneumococci. (a) Sampling location of the study strains. (b) Maximum likelihood phylogeny of the carried pneumococcal strains reconstructed using core genome SNPs from 660 study strains demonstrating their genetic similarity and diversity. The strains' metadata namely GC (lineage), sampling period, age group and serotype category of the subjects shown by coloured strips around the phylogeny. The colours for phylogenetic branches correspond to the inferred GCs as shown in the metadata key next to the tree. The tree was rooted at the mid-point of the branch separating 'classical' non-typeable (NT) pneumococcal GC (GC15) from rest of the strains. Detailed characteristics of the study strains are provided in S1 Data.

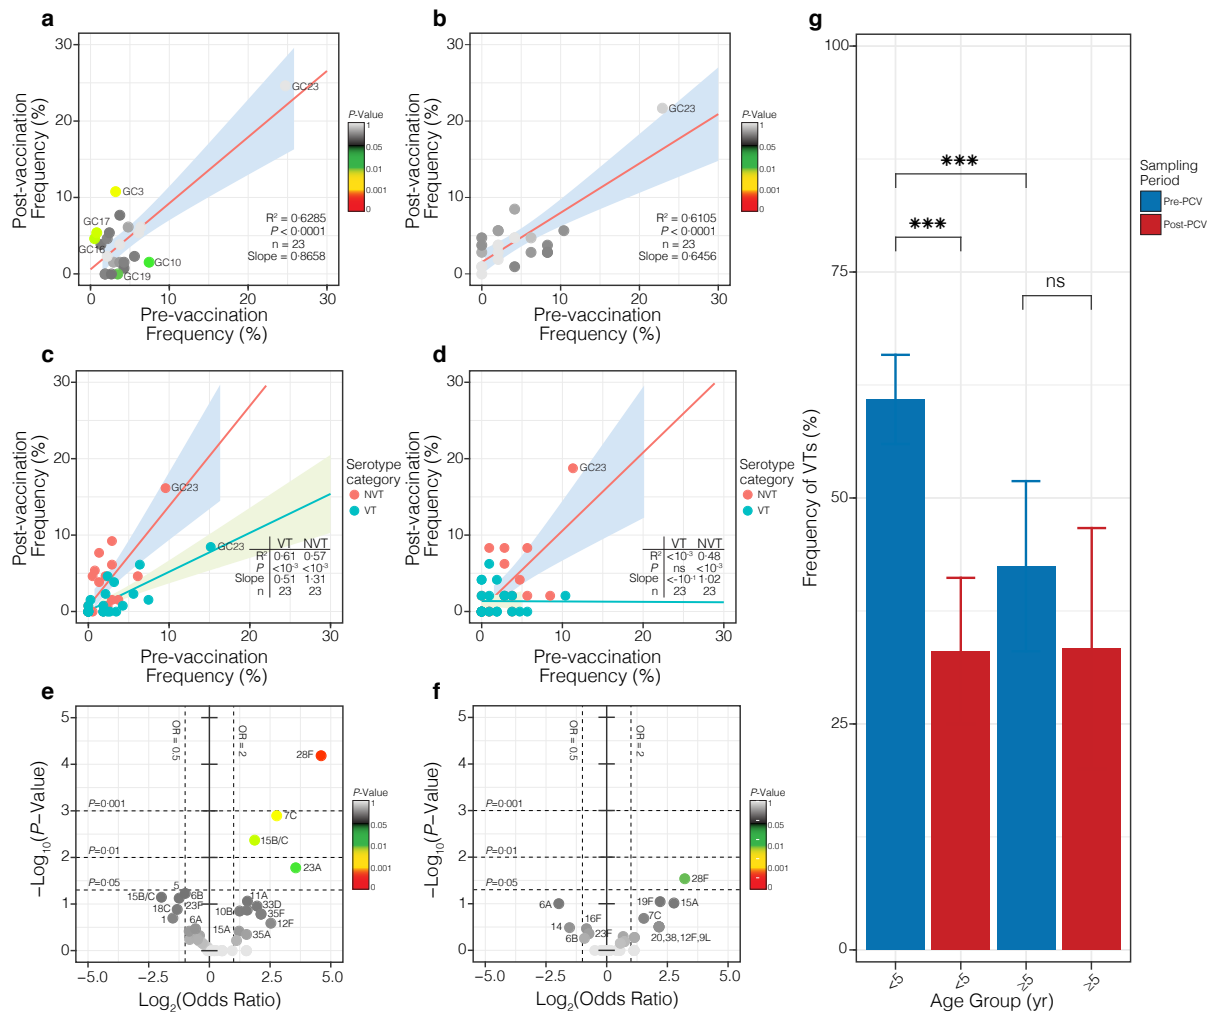

**Fig 2:** Frequency of GCs and serotypes in carriage. The scatter plot showing frequency of GCs before and after vaccination in (a) under-fives and (b) over-fives. Fitted linear regression for the overall trend in GC frequency of VT and NVT strains pre- and post-vaccination. (c) The scatter plots showing frequency of VT serotypes in GCs pre- and post-vaccination in (d) under-fives and (e) over-fives. The regression lines are bordered by 95% CI. The changes of individual serotype frequency are shown by volcano plots for strains in (f) under-fives and (g) over-fives where the x-axis shows magnitude ( $\log_2$  odds ratio) and y-axis shows statistical significance ( $-\log_{10} P$ -value) of change after compared to before vaccination. Statistically significant changes are marked with asterisks: ‘ns’: not significant,  $P < 0.05$  (\*),  $P < 0.01$  (\*\*) and  $P < 0.001$  (\*\*\*)).



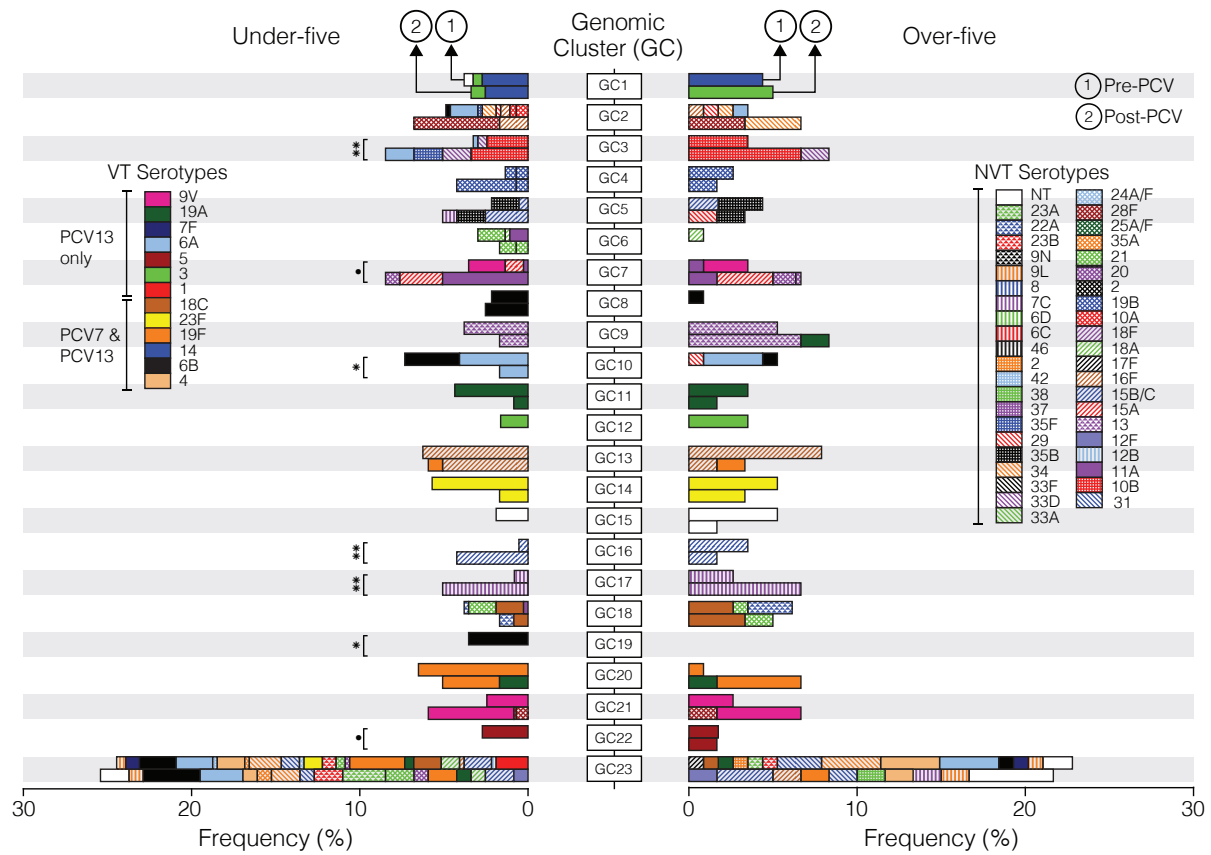

**Fig 3:** Dynamics of pneumococcal GCs and serotypes. The leftward facing stacked bar graph shows frequency of GCs in under-fives while (b) the rightward facing bar graph shows frequency of GCs and their constituent serotypes in over-fives before and after PCV introduction. The bar graphs are aligned by genomic clusters (GC) for easy comparisons of frequency of serotypes pre- and post-vaccination between the two age groups. The serotypes are distinguished by different colours in the bar graphs as described in the key. GC23 is the ‘bin’ cluster consisting of unclustered strains not placed in clusters GC1-22. The GCs whose frequency changed significantly post-vaccination are marked with asterisks:  $P < 0.05$  (\*) and  $P < 0.01$  (\*\*) and those with borderline significance  $P < 0.095$  (.). The Fisher’s exact test was used to determine  $P$ -values.

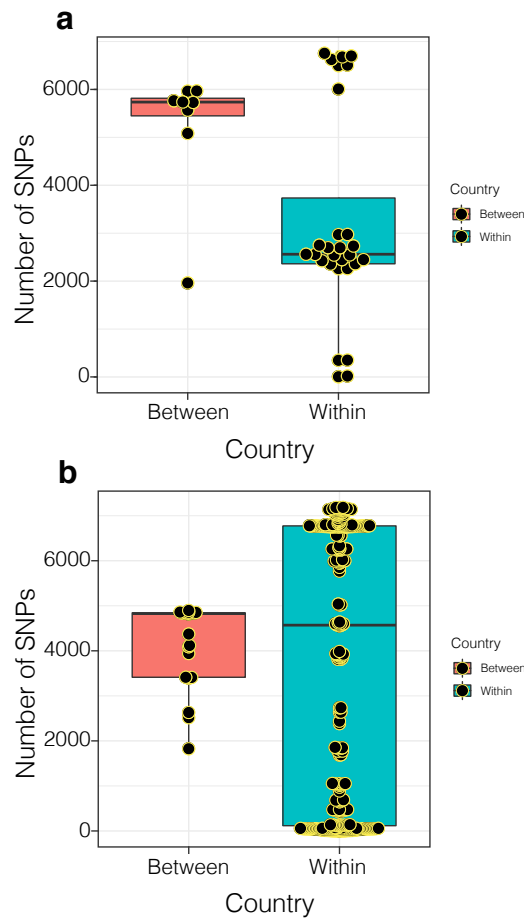

**Fig 4:** Genetic diversity of a recently emerged serotypes (28F). Boxplots showing within (Malawi) and between country (Malawi and South Africa) genetic diversity of serotype 28F strains showing in (a) GC2 (b) GC21. Lineage GC21 also include serotype 9V strains, which some of which underwent a capsule-switch to acquire a serotype 28F capsule. Additional details are provided in in S11 Fig

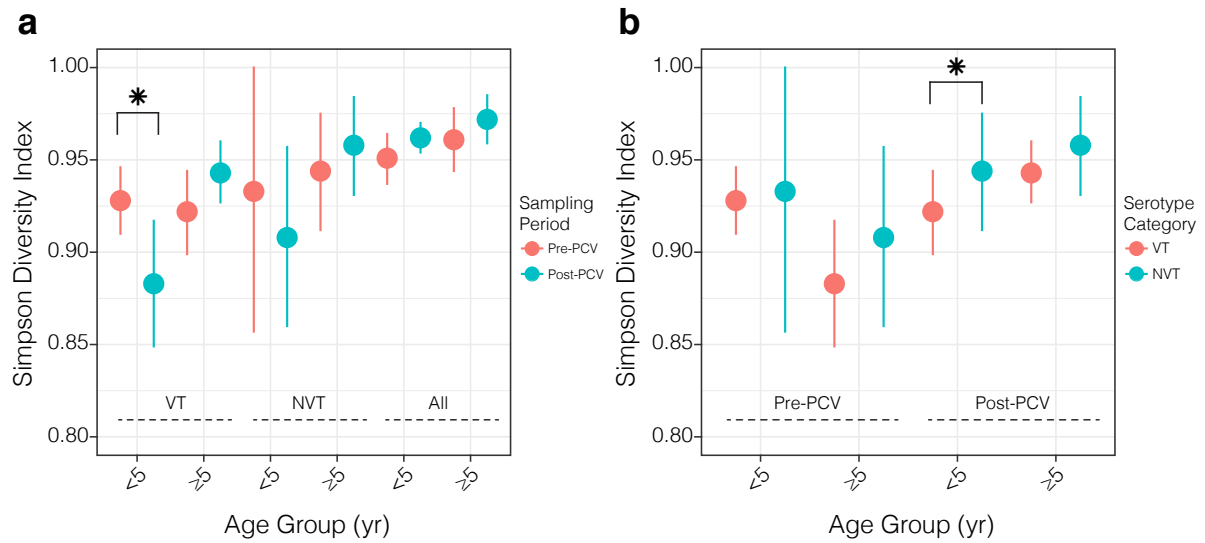

**Fig 5:** Serotype composition and diversity in context of PCV. (a) Simpson diversity index for composition of serotypes between pre- and post-vaccination datasets among VT, NVT and all strains among isolates. (b) Simpson diversity index for composition of serotypes between VT and NVT strains sampled pre- and post-vaccination. Statistically significant changes are marked with asterisks: ‘ns’: not significant,  $P < 0.05$  (\*),  $P < 0.01$  (\*\*), and  $P < 0.001$  (\*\*\*). The estimates and  $P$ -values for frequency of VTs and Simpson diversity are summarised in S6,7 Table.

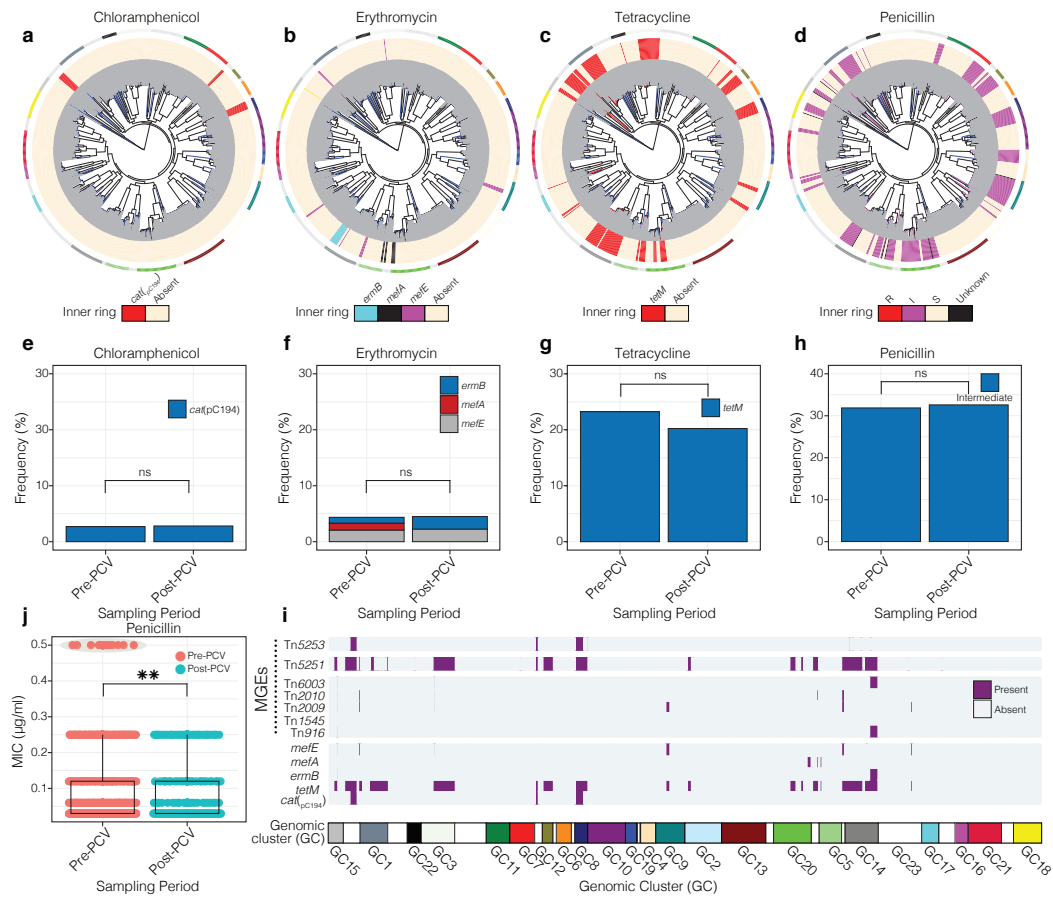

**Fig 6:** Distribution of antibiotic resistance genes and MGEs. (a) Distribution of *cat<sub>pC194</sub>* chloramphenicol resistance gene. (b) Distribution of *mefA*, *mefE* and *ermB* erythromycin resistance genes. (c) Distribution of *tetM* tetracycline resistance gene. (d) Distribution of penicillin MICs. Branches of the maximum likelihood phylogenies and innermost ring surrounding the trees in a-c are coloured by presence and absence of the genes as shown in the key at the bottom of the phylogeny. The outermost ring around the phylogenies shows the GCs corresponding to those in Fig 1b and the colour strip at the bottom of this figure. (e-h) Frequency of genotypic antibiotic resistance rates for chloramphenicol, erythromycin, tetracycline and intermediate penicillin resistance pre- and post-vaccination. (i) Distribution of penicillin MICs pre- and post-vaccination. (j) The horizontal panel shows the distribution of the antibiotic resistance conferring genes and MGEs that disseminate them. The subsets with statistically significant changes are marked with asterisks: ‘ns’: not significant,  $P < 0.05$  (\*),  $P < 0.01$  (\*\*) and  $P < 0.001$  (\*\*\*).

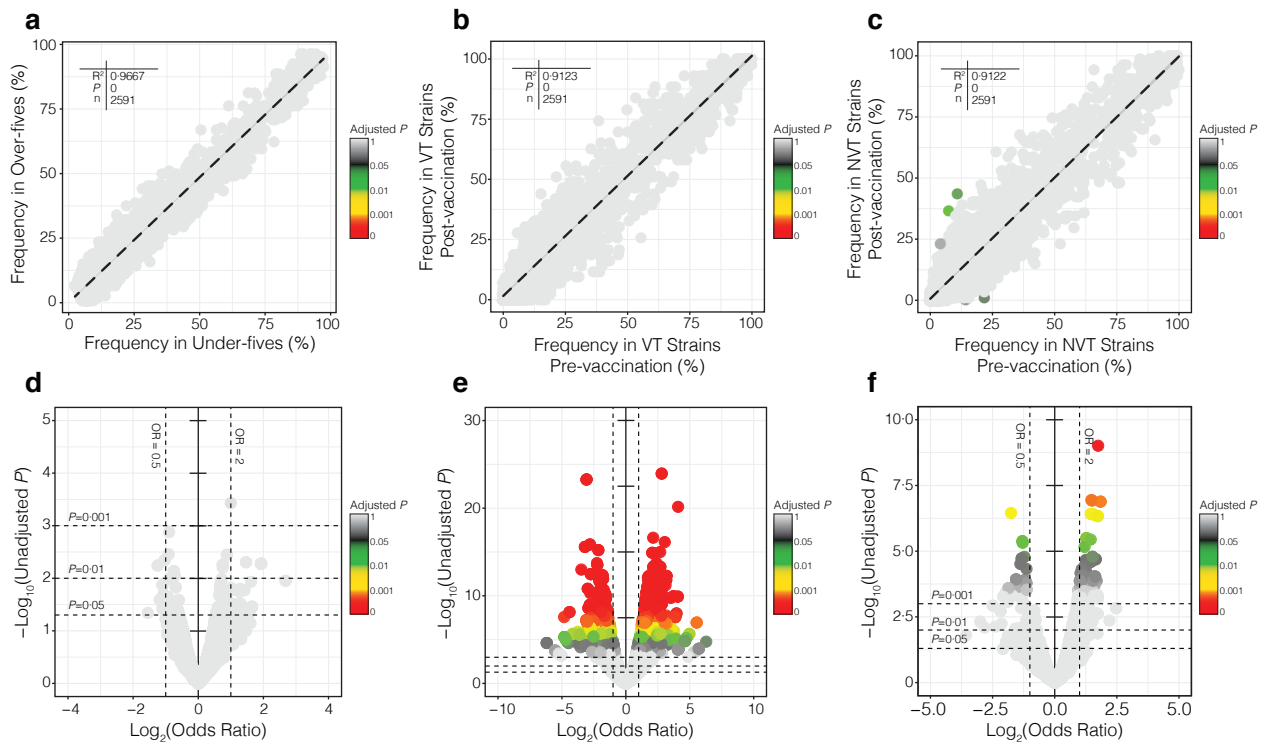

**Fig 7:** Pneumococcal accessory genome dynamics. The distribution of 2,591 intermediate frequency accessory genes in the entire pneumococcal population. (a) Scatter plot showing frequency of accessory genes between isolates sampled from under-fives and over-fives pre-vaccination. (b) Scatter plot showing frequency of genes among VT isolates pre- and post-vaccination. (c) Scatter plot showing frequency of genes among NVT isolates pre- and post-vaccination. Coefficients from linear regression and are labelled on the plots. Volcano plots show magnitude ( $\log_2$  odds ratio) on the x-axis and statistical significance ( $-\log_{10} P$ -value) for  $P$ -values and odds ratio for the association of accessory genes with different variables namely (d) age group, (e) serotype category and (f) sampling period. The points were coloured by adjusted  $P$ -values after correcting for multiple testing using Bonferroni method.

**Table 1:** Coefficients for the effect of sampling period on presence and absence of accessory genes using logistic regression accounting for age and serotype category after Bonferroni adjustment for multiple testing (only top 25 hits shown). Full list is shown in S9 Table.

| Accessory gene   | Odds ratio (95% CI) | Raw <i>P</i> -value    | Adjusted <i>P</i> -value | Description/product                                    |
|------------------|---------------------|------------------------|--------------------------|--------------------------------------------------------|
| COG_6818         | 3.34 (2.24,4.99)    | 3.75×10 <sup>-09</sup> | 9.71×10 <sup>-06</sup>   | Glycosyl transferase                                   |
| COG_7104         | 3.34 (2.20,5.06)    | 1.33×10 <sup>-08</sup> | 3.46×10 <sup>-05</sup>   | Double glycine cleavage site bacteriolysin superfamily |
| <i>hsdR_1</i>    | 3.34 (2.20,5.06)    | 1.33×10 <sup>-08</sup> | 3.46×10 <sup>-05</sup>   | Type I restriction-modification system, R subunit      |
| COG_2038         | 2.78 (1.91,4.06)    | 1.12×10 <sup>-07</sup> | 2.91×10 <sup>-04</sup>   | ABC transporter permease                               |
| COG_900          | 2.78 (1.91,4.06)    | 1.12×10 <sup>-07</sup> | 2.91×10 <sup>-04</sup>   | IS <i>630</i> -Spn1, transposase <i>Orf1</i>           |
| COG_5542         | 2.84 (1.93,4.18)    | 1.17×10 <sup>-07</sup> | 3.03×10 <sup>-04</sup>   | Replication protein                                    |
| <i>ptrB</i>      | 0.30 (0.19,0.47)    | 3.48×10 <sup>-07</sup> | 9.02×10 <sup>-04</sup>   | Prolyl oligopeptidase family protein                   |
| COG_4000         | 2.95 (1.94,4.48)    | 3.96×10 <sup>-07</sup> | 1.03×10 <sup>-03</sup>   | Phage protein gp27                                     |
| <i>rlmN</i>      | 2.95 (1.94,4.48)    | 3.96×10 <sup>-07</sup> | 1.03×10 <sup>-03</sup>   | Ribosomal RNA large subunit methyltransferase N        |
| COG_4863         | 3.34 (2.09,5.33)    | 4.59×10 <sup>-07</sup> | 1.19×10 <sup>-03</sup>   | Hypothetical protein                                   |
| COG_5488         | 2.54 (1.76,3.65)    | 5.24×10 <sup>-07</sup> | 1.36×10 <sup>-03</sup>   | Phage protein                                          |
| COG_842          | 0.40 (0.28,0.58)    | 6.98×10 <sup>-07</sup> | 1.81×10 <sup>-03</sup>   | ABC transporter permease                               |
| IS861 truncation | 0.40 (0.28,0.58)    | 6.98×10 <sup>-07</sup> | 1.81×10 <sup>-03</sup>   | IS <i>861</i> truncation                               |
| COG_1881         | 2.74 (1.82,4.14)    | 1.59×10 <sup>-06</sup> | 4.11×10 <sup>-03</sup>   | SNF2 family protein                                    |
| COG_802          | 2.74 (1.82,4.14)    | 1.59×10 <sup>-06</sup> | 4.11×10 <sup>-03</sup>   | Transposase                                            |
| COG_4974         | 3.00 (1.91,4.72)    | 1.93×10 <sup>-06</sup> | 5.00×10 <sup>-03</sup>   | Membrane associated protein                            |
| COG_1144         | 2.41 (1.67,3.50)    | 3.15×10 <sup>-06</sup> | 8.17×10 <sup>-03</sup>   | 2-isopropylmalate synthase                             |
| COG_3978         | 0.41 (0.28,0.60)    | 4.17×10 <sup>-06</sup> | 1.08×10 <sup>-02</sup>   | Rep protein                                            |
| COG_5509         | 0.41 (0.28,0.60)    | 4.17×10 <sup>-06</sup> | 1.08×10 <sup>-02</sup>   | Phage protein gp27                                     |
| COG_6116         | 0.41 (0.28,0.60)    | 4.17×10 <sup>-06</sup> | 1.08×10 <sup>-02</sup>   | ABC transporter permease                               |
| <i>saeS</i>      | 0.41 (0.28,0.60)    | 4.21×10 <sup>-06</sup> | 1.09×10 <sup>-02</sup>   | Histidine kinase                                       |
| COG_6305         | 0.41 (0.28,0.60)    | 4.77×10 <sup>-06</sup> | 1.24×10 <sup>-02</sup>   | Bacteriocin                                            |
| COG_748          | 0.41 (0.28,0.60)    | 4.77×10 <sup>-06</sup> | 1.24×10 <sup>-02</sup>   | Hypothetical protein                                   |
| <i>blpPQ</i>     | 0.19 (0.09,0.39)    | 5.20×10 <sup>-06</sup> | 1.35×10 <sup>-02</sup>   | Bacteriocin BlpPQ                                      |
| COG_2726         | 0.41 (0.28,0.61)    | 5.84×10 <sup>-06</sup> | 1.51×10 <sup>-02</sup>   | Tn <i>5252</i> , <i>Orf 9</i> protein                  |
